# Supplementary material for: Bilateral Pheochromocytoma with Germline MAX Variant without Family History
Source: MDPI journal article supplement (doi:10.3390/clinpract12030035), 2022-05-07
Supplement: s1 [file s1]

Table S1

| Reference         | Sex | Age | Family History | PCC  | PGL | Metastasis | Other Disease | cDNA Variant   | Protein Alteration | IHC |
|-------------------|-----|-----|----------------|------|-----|------------|---------------|----------------|--------------------|-----|
| Comino-Méndez [5] | M   | 29  | Yes            | bPCC | -   | No         | -             | c.223C>T       | p.(Arg75X)         | -   |
|                   | M   | 35  | Yes            | bPCC | -   | No         | -             | c.223C>T       | p.(Arg75X)         | -   |
|                   | F   | 34  | Yes            | bPCC | -   | No         | -             | c.223C>T       | p.(Arg75X)         | -   |
|                   | F   | 28  | Yes            | bPCC | -   | No         | -             | c.223C>T       | p.(Arg75X)         | -   |
|                   | M   | 32  | Yes            | bPCC | -   | Yes        | -             | c.295+1G>A     | p.?                | -   |
|                   | F   | 46  | Yes            | bPCC | -   | Yes        | -             | c.1A>G         | p.(Met1?)          | -   |
|                   | M   | 29  | Yes            | PCC  | -   | No         | -             | c.1A>G         | p.(Met1?)          | -   |
|                   | M   | 17  | No             | bPCC | -   | No         | -             | c.97C>T        | p.(Arg33X)         | -   |
|                   | F   | 47  | Yes            | bPCC | -   | No         | -             | c.185_186delA  | p.(Gln62AsnfsX23)  | -   |
|                   | F   | 26  | No             | PCC  | -   | Yes        | -             | c.67G>A        | p.(Asp23Asn)       | -   |
|                   | F   | 22  | No             | PCC  | -   | No         | -             | c.425C>T       | p.(Ser142Leu)      | -   |
|                   | F   | 41  | Yes            | PCC  | -   | No         | -             | c.281T>C       | p.(Leu94Pro)       | -   |
| Burnichon [15]    | M   | 27  | No             | PCC  | No  | No         | No            | c.1-?_483.?del | p.?                | Neg |
|                   | F   | 46  | No             | bPCC | Yes | No         | No            | c.2T>A         | p.?                | Neg |
|                   | F   | 43  | No             | bPCC | Yes | No         | BrC, RO       | c.73C>T        | p.(Arg25Trp)       | -   |
|                   | M   | 23  | Yes            | bPCC | No  | No         | No            | c.97C>T        | p.(Arg33)          | -   |
|                   | M   | 27  | Yes            | bPCC | No  | No         | No            | c.97C>T        | p.(Arg33)          | -   |
|                   | M   | 34  | No             | bPCC | No  | No         | No            | c.97C>T        | p.(Arg33)          | Neg |
|                   | F   | 58  | Yes            | PCC  | No  | No         | No            | c.97C>T        | p.(Arg33)          | Neg |
|                   | F   | 26  | Yes            | PCC  | No  | No         | No            | c.97C>T        | p.(Arg33)          | Neg |
|                   | M   | 38  | No             | PCC  | No  | No         | SCCT          | c.97C>T        | p.(Arg33)          | -   |
|                   | M   | 24  | Yes            | bPCC | No  | No         | CCH           | c.97C>T        | p.(Arg33)          | -   |
|                   | F   | 43  | No             | PCC  | Yes | No         | No            | c.97C>T        | p.(Arg33)          | -   |
|                   | F   | 18  | No             | bPCC | No  | No         | No            | c.171+1G>A     | p.?                | -   |
|                   | F   | 55  | No             | bPCC | No  | No         | No            | c.178C>T       | p.(Arg60Trp)       | -   |
|                   | F   | 34  | No             | bPCC | No  | No         | No            | c.212T>G       | p.(Ile71Ser)       | Pos |
|                   | M   | 57  | No             | PCC  | No  | No         | PA            | c.220A>G       | p.(Met74Val)       | Pos |
|                   | M   | 18  | No             | bPCC | No  | No         | HPT           | c.223C>T       | p.(Arg75)          | -   |
|                   | F   | 18  | Yes            | PCC  | No  | Yes        | No            | c.244C>T       | p.(Gln82)          | -   |
|                   | F   | 40  | No             | bPCC | Yes | Yes        | No            | c.295+1G>T     | p.?                | Neg |
|                   | M   | 13  | Yes            | PCC  | No  | No         | No            | c.305T>C       | p.(Leu102Pro)      | -   |
|                   | F   | 48  | No             | No   | Yes | No         | No            | c.-18C>T       | p.(=)              | -   |
|                   | M   | 13  | No             | PCC  | Yes | No         | No            | c.25G>T        | p.(Val9Leu)        | Pos |
|                   | M   | 22  | No             | PCC  | No  | No         | No            | c.63G>T        | p.(=)              | -   |

|                  |   |    |     |      |     |     |                      |              |                    |     |
|------------------|---|----|-----|------|-----|-----|----------------------|--------------|--------------------|-----|
| Korpershoek [20] | F | 80 | No  | PCC  | No  | No  | No                   | c.414G>A     | p.(=)              | -   |
|                  | F | 29 | No  | PCC  | No  | No  | No                   | c.269G>C     | p.(Arg90Pro)       | -   |
|                  | M | 39 | No  | PCC  | No  | No  | No                   | c.223C>T     | p.(Arg75)          | Neg |
|                  | F | 57 | No  | PCC  | No  | No  | ReC                  | c.103C>T     | p.(Arg35Cys)       | Pos |
|                  | M | 24 | No  | PCC  | No  | No  | No                   | c.140_157del | p.(Arg47_Ser52del) | Neg |
|                  | F | 56 | No  | PCC  | No  | No  | No                   | c.25del      | p.(Val9Trpfs56)    | Neg |
|                  | M | 45 | Yes | bPCC | No  | No  | RO, β-T              | -            | -                  | Neg |
|                  | M | 28 | Yes | bPCC | No  | Yes | β-T, T1DM            | -            | -                  | Neg |
|                  | M | 55 | Yes | bPCC | No  | No  | No                   | -            | -                  | Neg |
| Bausch [16]      | F | 36 | No  | PCC  | No  | -   | -                    | c.73C>T      | -                  | -   |
|                  | F | 23 | No  | PCC  | No  | -   | -                    | c.146C>G     | -                  | -   |
|                  | F | 50 | Yes | bPCC | No  | -   | -                    | c.242_243del | -                  | -   |
| Roszko [21]      | M | 21 | No  | PCC  | No  | -   | -                    | c.292dup     | -                  | -   |
|                  | M | 26 | No  | bPCC | No  | -   | -                    | c.307G>T     | -                  | -   |
|                  | F | 49 | No  | bPCC | No  | No  | PRLoma, HPT          | c.296-1G>T   | -                  | Neg |
|                  | F | 24 | No  | bPCC | Yes | No  | No                   | c.70_73 del  | p.(Lys24fs*40)     | -   |
|                  | M | 27 | Yes | bPCC | No  | No  | No                   | c.97C>T      | p.(Arg33*)         | Neg |
| Daly [23]        | M | 32 | No  | PCC  | No  | No  | PRLoma               | -            | -                  | Neg |
|                  | F | 35 | No  | bPCC | No  | No  | Acro, TC             | -            | -                  | Neg |
|                  | M | 22 | No  | bPCC | No  | No  | Acro                 | -            | -                  | Neg |
| Kobza [24]       | F | 39 | No  | bPCC | No  | No  | PRLoma, HPT          | c.171+2T>A   | -                  | -   |
| Pozza [25]       | F | 15 | No  | bPCC | Yes | Yes | GNB                  | c.299G>C     | p.(Arg100Pro)      | -   |
| Chang [26]       | F | 31 | No  | PCC  | No  | Yes | TC                   | c.97C>T      | p.(Arg33Ter)       | Neg |
| Choi [27]        | F | 39 | -   | bPCC | No  | No  | -                    | c.3G>A       | p.(Met1?)          | -   |
| Duarte [28]      | M | 27 | Yes | PCC  | No  | No  | NB                   | c.97C>T      | p.(Arg33Ter)       | -   |
|                  | M | 32 | Yes | bPCC | No  | No  | No                   | c.97C>T      | -                  | -   |
|                  | M | 24 | Yes | bPCC | No  | No  | No                   | c.97C>T      | -                  | -   |
| Seabrook [29]    | M | 19 | Yes | PCC  | No  | No  | No                   | c.97C>T      | -                  | -   |
|                  | M | 21 | Yes | bPCC | Yes | Yes | Acro                 | c.200C>A     | p.(Ala67Asp)       | Neg |
|                  | M | 42 | Yes | bPCC | No  | No  | No                   | c.200C>A     | p.(Ala67Asp)       | Neg |
|                  | M | 50 | Yes | PCC  | No  | Yes | No                   | c.200C>A     | p.(Ala67Asp)       | Neg |
|                  | F | 23 | Yes | bPCC | No  | ?   | No                   | c.200C>A     | p.(Ala67Asp)       | Neg |
|                  | M | 30 | Yes | bPCC | No  | No  | No                   | c.200C>A     | p.(Ala67Asp)       | Neg |
|                  | F | 14 | Yes | bPCC | No  | No  | Acro                 | c.200C>A     | p.(Ala67Asp)       | Neg |
| Mamedova [30]    | F | 21 | No  | bPCC | No  | Yes | RiC, PRLoma, PHT, LA | C.22G>T      | p.(Glu8*)          | -   |
|                  | F | 21 | No  | bPCC | No  | No  | PRLom, Acro          | c.223C>T     | p.(R75X)           | -   |

|                |   |    |    |     |    |    |    |           |   |   |
|----------------|---|----|----|-----|----|----|----|-----------|---|---|
| Lam-Chung [31] | F | 38 | No | PCC | No | No | No | c.64-2A>G | - | - |
|----------------|---|----|----|-----|----|----|----|-----------|---|---|
